# Supplementary material for: Metabolic shift and the effect of mitochondrial respiration on the osteogenic differentiation of dental pulp stem cells
Source: PeerJ journal article supplement (doi:10.7717/peerj.15164), 2023-04-21
Supplement: Figure_4-AMPK-WB.zip [file Figure_4-AMPK-WB.zip]

Some blots didn't show markers because they were arranged in ONE membrane with only ONE protein marker

Sample 1

Day 1

Day 3

Day 5

Day 7

p-AMPK  
64kDa

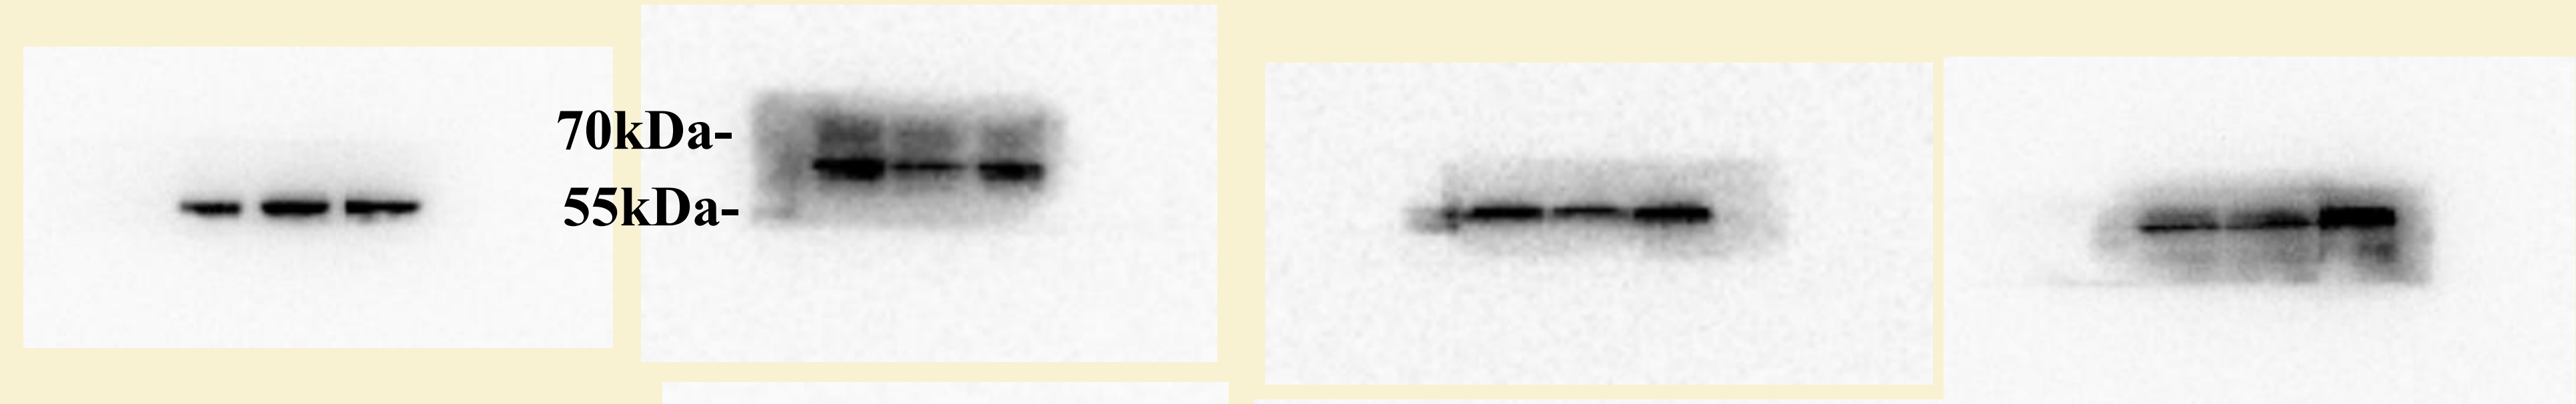

AMPK  
62kDa

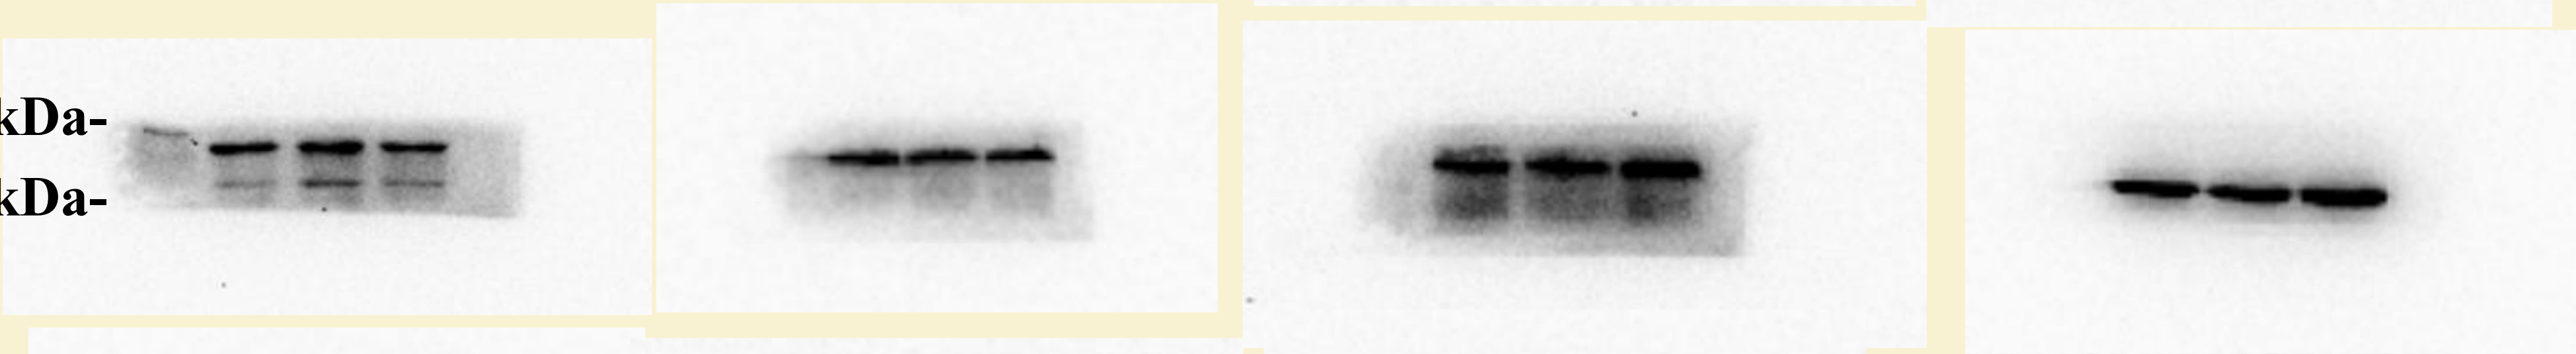

GAPDH  
37kDa

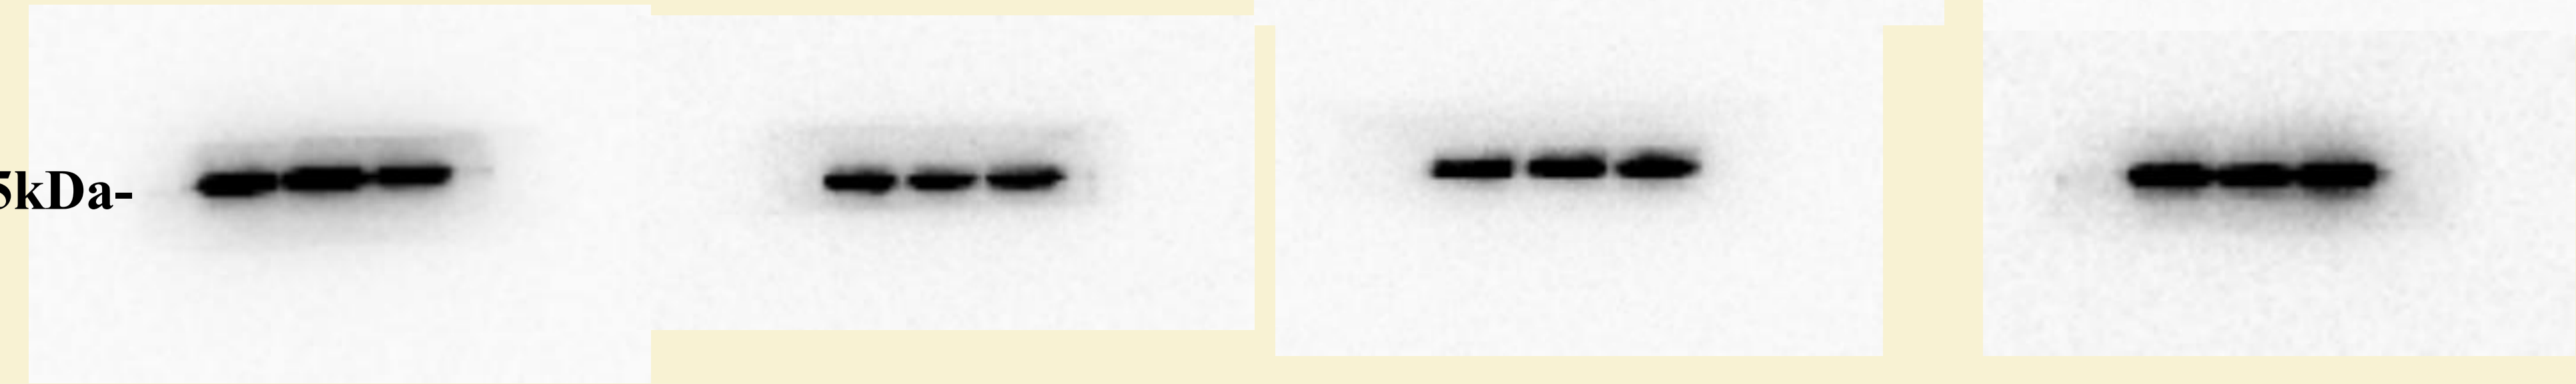

Blank  
MM+CCCP  
MM

Blank  
MM  
MM+CCCP

Blank  
MM  
MM+CCCP

Blank  
MM  
MM+CCCP
