# Supplementary material for: Metabolic shift and the effect of mitochondrial respiration on the osteogenic differentiation of dental pulp stem cells
Source: PeerJ. 2023 Apr 21;11:e15164. doi: 10.7717/peerj.15164 (PMC10124543; doi:10.7717/peerj.15164)
Supplement: Supplemental Information 3 [file peerj-11-15164-s003.xls]

## Sheet: ALP activity
ALP activity
Average	Control	OIM		SD		Control	OIM	OIM+CCCP
0d	2.1	2.2			0d	0.180169	0.09	0.13925
1d	2.24	2.36			1d	0.220368	0.19143	0.138976
3d	1.97638	5.63366			3d	0.103023	0.073634	0.0861737
5d	2.85832	7.74034			5d	0.0844868	0.0663987	0.195765
7d	2.29294	11.2474			7d	0.106877	0.18186	0.0483776
day	group	OD	protein	ALP	average	SD	p/T-test	p/ANOVA
0天	A	0.067	0.78135	1.87562				0
control	A	0.069	0.78135	2.09628	2.09628	0.180169
	A	0.071	0.78135	2.31694
	B	0.069	0.74335	2.20345
OIM	B	0.068	0.74335	2.08747	2.20345	0.0946898	0.511
	B	0.07	0.74335	2.31942
1	A	0.072	0.88714	2.44826
	A	0.067	0.88714	1.9382	2.24423	0.220368
	A	0.071	0.88714	2.34625
	B	0.076	0.9714	2.60854
	B	0.071	0.9714	2.14273	2.36011	0.19143	0.614
	B	0.073	0.9714	2.32905
3	A	0.132	3.09468	2.09179
	A	0.124	3.09468	1.84203	1.97732	0.103023
	A	0.129	3.09468	1.99813
	B	0.242	3.09275	5.52953
	B	0.247	3.09275	5.68573	5.63366	0.073634	0
	B	0.247	3.09275	5.68573
5	A	0.353	4.71055	2.8568
	A	0.343	4.71055	2.75829	2.86008	0.0844868
	A	0.364	4.71055	2.96516
	B	0.695	3.79938	7.71893
	B	0.704	3.79938	7.82885	7.73929	0.0663987	0
	B	0.691	3.79938	7.67008
7	A	0.305	3.85688	2.41656
	A	0.279	3.85688	2.15477	2.28566	0.106877
	A	0.292	3.85688	2.28566
	B	1.56	5.08134	11.4258
	B	1.504	5.08134	10.9978	11.2474	0.18186	0
	B	1.546	5.08134	11.3188

## Sheet: HK
day	group		OD	protein	HK	AVERAGE	SD	p/t-test
0	A	0.345	0.395	2.18335	47.863										Control	OIM		SD		control	OIM
Control	A	0.348	0.408	2.18335	57.4356	52.6493	3.90799							0d	52.65	51.36			0d	3.90799	1.65739
	A	0.344	0.399	2.18335	52.6493									1d	47.91	50.2073			1d	3.98534	4.1767
	B	0.344	0.396	2.14335	50.7065									3d	52.0029	60.1448			3d	1.98821	2.52855
OIM	B	0.338	0.393	2.14335	53.6318	51.3565	1.65739	0.689						5d	52.8583	41.8075			5d	4.91	1.19
	B	0.344	0.395	2.14335	49.7313									7d	52.2929	37.2926			7d	4.15	3.22707
1	A	0.254	0.26	0.38414	50.7251
	A	0.26	0.265	0.38414	42.2709	47.907	3.98534
	A	0.256	0.262	0.38414	50.7251
	B	0.247	0.253	0.36654	53.1607
	B	0.249	0.254	0.36654	44.3006	50.2073	4.1767	0.603
	B	0.243	0.249	0.36654	53.1607
3	A	0.405	0.478	3.09468	49.3015
	A	0.405	0.485	3.09468	54.029	52.0029	1.98821
	A	0.411	0.489	3.09468	52.6783
	B	0.401	0.491	3.09275	60.8206
	B	0.402	0.495	3.09275	62.8479	60.1448	2.52855	0.023
	B	0.405	0.489	3.09275	56.7659
5	A	0.466	0.586	4.71055	53.243
	A	0.465	0.578	4.71055	50.1372	52.3556	1.57911
	A	0.459	0.58	4.71055	53.6867
	B	0.515	0.59	3.79938	41.2574
	B	0.509	0.581	3.79938	39.6071	41.8075	2.05828	0.005
	B	0.507	0.588	3.79938	44.558
7	A	0.546	0.637	3.85688	49.3126
	A	0.536	0.645	3.85688	59.0668	52.2028	4.87373
	A	0.559	0.648	3.85688	48.2288
	B	0.59	0.679	5.08134	36.607
	B	0.565	0.666	5.08134	41.5428	37.2926	3.22707	0.023
	B	0.587	0.669	5.08134	33.7278

## Sheet: LDH
LDH
average	Control	OIM		SD		control	OIM
0d	1521.13	1482.78			0d	33.7	53.21
1d	1531.93	1508.09			1d	65.46	25.29
3d	1540.3	1735.22			3d	39.34	30.82
5d	1531.72	1453.37			5d	12.76	7.55
7d	1510.13	984.63			7d	44.6	45.66
day	group		OD	protein	LDH	AVERAGE	SD	p/t-test
0	A	0.644	0.12	0.44605	1477.68
	A	0.675	0.134	0.44595	1525.96	1521.15	33.7015
	A	0.674	0.121	0.44595	1559.81
	B	0.672	0.135	0.45935	1470.49
	B	0.688	0.121	0.45935	1552.65	1482.36	53.2083	0.433
	B	0.623	0.103	0.45935	1423.94
1	A	0.549	0.082	0.38414	1500.87
	A	0.589	0.084	0.38414	1622.99	1531.93	65.4623
	A	0.542	0.084	0.38414	1471.94
	B	0.52	0.097	0.33901	1540.43
	B	0.492	0.086	0.33901	1478.52	1508.87	25.2887	0.666
	B	0.505	0.091	0.33901	1507.66
3	A	0.601	0.156	0.28168	1587.75
	A	0.53	0.112	0.28168	1491.41	1540.17	39.3376
	A	0.549	0.117	0.28168	1541.36
	B	0.632	0.125	0.299275	1702.61
	B	0.661	0.132	0.299275	1776.49	1735.07	30.8191	0.005
	B	0.641	0.127	0.299275	1726.11
5	A	2.534	0.162	1.69355	1539.13
	A	2.538	0.161	1.69355	1542.37	1531.78	12.763
	A	2.49	0.157	1.69355	1513.82
	B	2.543	0.17	1.79938	1449.22
	B	2.563	0.166	1.79938	1463.87	1453.29	7.55133	0.002
	B	2.536	0.167	1.79938	1446.77
7	A	3.167	0.289	1.85688	1534.57
	A	3.006	0.291	1.85688	1447.65	1510.22	44.5992
	A	3.206	0.302	1.85688	1548.43
	B	1.219	0.183	1.08134	948.585
	B	1.337	0.191	1.08134	1049.3	984.904	45.6609	0
	B	1.235	0.19	1.08134	956.825

## Sheet: PCR-ALP
		group	sample	gapdh Ct	ALP Ct	△Ct	mean of △Ct	△△Ct	2-△△Ct	mean	SD	P
	0d	A	1	13.055	24.051	10.996		-0.0206667	1.01443
			2	12.917	23.977	11.06	11.0167	0.0433333	0.97041	1.00022	0.0210898
control			3	12.982	23.976	10.994		-0.0226667	1.01584
		B	1	12.922	23.918	10.996		-0.0206667	1.01443					mean					std
			2	12.929	23.94	11.011		-0.00566667	1.00394	1.00468	0.00796787	0.805			Control	OIM				Control	OIM
OIM			3	12.963	23.987	11.024		0.00733333	0.99493					0d	1.00022	1.00468			0d	0.0210898	0.00796787
														1d	0.986132	1.0297			1d	0.0203378	0.0300069
														3d	1.00223	1.40345			3d	0.0678142	0.0733248
														5d	1.01157	1.63795			5d	0.152926	0.0841139
	1d	A	1	13.488	24.721	11.233		0.0126667	0.991259					7d	1.00123	2.32037			7d	0.0492458	0.0715274
			2	13.468	24.716	11.248	11.2203	0.0276667	0.981006	0.986132	0.0203378
			3	13.54	24.72	11.18		-0.0403333	1.02835
		B	1	13.73	24.968	11.238		0.0176667	0.987829
			2	13.803	24.943	11.14		-0.0803333	1.05726	1.02951	0.0300069	0.317
			3	13.786	24.945	11.159		-0.0613333	1.04343
	3d	A	1	12.85	26.728	13.878		-0.135	1.09809
			2	12.806	26.883	14.077	14.013	0.064	0.956608	1.00223	0.0678142
			3	12.767	26.851	14.084		0.071	0.951978
		B	1	12.784	26.303	13.519		-0.494	1.40834
			2	12.737	26.174	13.437		-0.576	1.49071	1.40345	0.0733248	0.005
			3	12.729	26.351	13.622		-0.391	1.3113
	5d	A	1	12.89	25.903	13.013		-0.267	1.2033
			2	12.458	25.736	13.278	13.28	-0.002	1.00139	1.01153	0.152612
			3	12.157	25.706	13.549		0.269	0.829895
		B	1	12.951	25.501	12.55		-0.73	1.65864
			2	12.917	25.408	12.491		-0.789	1.72788	1.63724	0.0841139	0.007
			3	12.92	25.591	12.671		-0.609	1.5252
	7d	A	1	13.931	24.014	10.083		-0.0756667	1.05385
			2	13.881	24.019	10.138	10.1587	-0.0206667	1.01443	1.00123	0.0492458
			3	13.845	24.1	10.255		0.0963333	0.935407
		B	1	13.562	22.504	8.942		-1.21667	2.32409
			2	13.499	22.391	8.892		-1.26667	2.40605	2.32037	0.0715274	0
			3	13.536	22.537	9.001		-1.15767	2.23096

## Sheet: PCR-col
		group	sample	gapdh Ct	COL-1 Ct	△Ct	mean of △Ct	△△Ct	2-△△Ct	mean	SD	p/t-test
control	0d	A	1	13.055	16.256	3.201		-0.166667	1.12246
			2	12.917	16.341	3.424	3.36767	0.0563333	0.961705	1.00351	0.085337
			3	12.982	16.46	3.478		0.110333	0.926374
OIM		B	1	12.519	15.8535	3.3345		-0.0331667	1.02326				mean				std
			2	12.516	15.903	3.387		0.0193333	0.986689	1.00509	0.0149294	0.981		Control	OIM			Control	OIM
			3	12.531	15.891	3.36		-0.00766667	1.00533				0d	1.00351	1.00506		0d	0.085337	0.0149294
													1d	0.996608	0.972821		1d	0.0270282	0.0249358
													3d	1.00349	1.03155		3d	0.0822666	0.0865273
													5d	1.01732	1.45564		5d	0.194212	0.0870142
	1d	A	1	13.488	15.858	2.37		-0.0413333	1.02906				7d	1.00101	1.75249		7d	0.044435	0.106417
			2	13.468	15.932	2.464	2.41133	0.0526667	0.964153	0.996608	0.0270282
			3	13.54	15.94	2.4		-0.0113333	1.00789
		B	1	13.73	16.134	2.404		-0.00733333	1.0051
			2	13.683	16.177	2.494		0.0826667	0.944311	0.972973	0.0249358	0.352
			3	13.666	16.122	2.456		0.0446667	0.969514
	3d	A	1	12.85	16.833	3.983		-0.0546667	1.03862
			2	12.806	16.73	3.924	4.03767	-0.113667	1.08197	1.00349	0.0822666
			3	12.767	16.973	4.206		0.168333	0.88987
		B	1	12.909	16.891	3.982		-0.0556667	1.03934
			2	12.923	16.78	3.857		-0.180667	1.13341	1.03155	0.0865273	0.756
			3	12.766	16.921	4.155		0.117333	0.92189
	5d	A	1	12.891	15.75	2.859		-0.366333	1.28907
			2	12.458	15.81	3.352	3.22533	0.126667	0.915945	1.01732	0.194212
			3	12.157	15.622	3.465		0.239667	0.846941
		B	1	12.9	15.528	2.628		-0.597333	1.51292
			2	12.727	15.347	2.62		-0.605333	1.52133	1.45564	0.0870142	0.044
			3	12.583	15.394	2.811		-0.414333	1.33268
	7d	A	1	13.931	17.823	3.892		-0.0583333	1.04126
			2	13.881	17.799	3.918	3.95033	-0.0323333	1.02266	1.00101	0.044435
			3	13.845	17.886	4.041		0.0906667	0.939089
		B	1	13.431	16.52	3.089		-0.861333	1.81672
			2	13.369	16.639	3.27		-0.680333	1.60251	1.75249	0.106417	0.001
			3	13.38	16.452	3.072		-0.878333	1.83825

## Sheet: PK
PK
Average	Control	OIM		SD		control	OIM
0d	1270.42	1242.41			0d	32.1826	32.7587
1d	1226.97	1273.08			1d	40.0863	50.4427
3d	1202.1	1393.08			3d	40.5152	48.7418
5d	1240.17	1200.43			5d	31.6442	40.0179
7d	1251.46	1080.12			7d	29.3222	41.6864
DAY	GROUP		OD	PROTEIN	PK			p/T-test
0	A	0.4	0.194	1.18	1309.61
	A	0.399	0.181	1.18	1270.88	1270.42	32.1826
	A	0.398	0.187	1.18	1230.78
	B	0.416	0.181	1.14	1210.43
	B	0.416	0.176	1.14	1229.42	1242.43	32.7587	0.437
	B	0.412	0.182	1.14	1287.44
1	A	0.512	0.183	0.38	1256.96
	A	0.514	0.177	0.38	1253.64	1226.97	40.0863
	A	0.528	0.18	0.38	1170.32
	B	0.526	0.441	0.07	1336.15
	B	0.514	0.451	0.07	1212.67	1273.08	50.4427	0.369
	B	0.519	0.453	0.07	1270.42
3	A	0.603	0.178	0.39	1251.73
	A	0.604	0.182	0.39	1152.49	1202.13	40.5152
	A	0.603	0.177	0.39	1202.15
	B	0.616	0.177	1.09	1360.56
	B	0.621	0.181	1.09	1461.98	1393.08	48.7418	0.013
	B	0.615	0.173	1.09	1356.71
5	A	0.273	0.196	1.71	1283.94
	A	0.277	0.188	1.71	1210.2	1240.17	31.6442
	A	0.274	0.177	1.71	1226.37
	B	0.343	0.193	1.8	1150.57
	B	0.331	0.2	1.8	1202.16	1200.42	40.0179	0.332
	B	0.323	0.179	1.8	1248.54
7	A	0.306	0.18	1.86	1291.84
	A	0.296	0.183	1.86	1223.13	1251.45	29.3222
	A	0.3	0.182	1.86	1239.39
	B	0.319	0.182	2.08	1134.53
	B	0.31	0.178	2.08	1033.27	1080.11	41.6864	0.009
	B	0.311	0.182	2.08	1072.52
