# Supplementary material for: Metabolic shift and the effect of mitochondrial respiration on the osteogenic differentiation of dental pulp stem cells
Source: PeerJ. 2023 Apr 21;11:e15164. doi: 10.7717/peerj.15164 (PMC10124543; doi:10.7717/peerj.15164)
Supplement: Supplemental Information 4 [file peerj-11-15164-s004.xlsx]

## Sheet: TFAM
		group	sample	gapdh Ct	TFAM Ct	△Ct	mean of △Ct	△△Ct	2-△△Ct	mean	SD	p/T-test	ANOVA
control	0d	A	1	13.055	31.244	18.189		-0.479667	1.39442				0
			2	12.917	32.03	19.113	18.6687	0.444333	0.734924	1.03505	0.272478			mean					std
			3	12.982	31.686	18.704		0.0353333	0.975806						Control	OIM				Control	OIM
OIM		B	1	12.922	31.815	18.893		0.224333	0.85599					0d	1.03505	0.958952			0d	0.272478	0.115557
			2	12.929	31.425	18.496		-0.172667	1.12714	0.958952	0.115557	>0.05		1d	1.03473	1.11391			1d	0.0482912	0.445017
			3	12.963	31.545	18.582		-0.0866667	1.06191					3d	1.00635	1.60506			3d	0.110257	0.180462
														5d	1.16909	3.94568			5d	0.558808	0.141246
														7d	1.05746	6.08927			7d	0.36854	0.62478
	1d	A	1	13.488	31.391	17.903		-0.0646667	1.04584
			2	13.468	31.402	17.934	17.9677	-0.0336667	1.02361	1.03473	0.0482912
			3	13.54	31.606	18.066		0.0983333	0.934111
		B	1	13.673	31.943	18.27		0.302333	0.81094
			2	13.593	30.759	17.166		-0.801667	1.74311	1.11391	0.445017	>0.05
			3	13.486	31.798	18.312		0.344333	0.787672
	3d	A	1	12.85	20.252	7.402		-0.146333	1.10675
			2	12.806	20.271	7.465	7.54833	-0.0833333	1.05946	1.00635	0.110257
			3	12.767	20.545	7.778		0.229667	0.852832
		B	1	12.909	19.633	6.724		-0.824333	1.77072
			2	12.923	19.714	6.791		-0.757333	1.69036	1.60506	0.180462	0.016
			3	12.766	19.877	7.111		-0.437333	1.3541
	5d	A	1	12.891	29.625	16.734		-0.841333	1.79171
			2	12.458	29.678	17.22	17.5753	-0.355333	1.27928	1.16909	0.558808
			3	12.157	30.929	18.772		1.19667	0.436282
		B	1	12.9	28.57	15.67		-1.90533	3.74595
			2	12.727	28.285	15.558		-2.01733	4.04835	3.94568	0.141246	0.002
			3	12.583	28.143	15.56		-2.01533	4.04274
	7d	A	1	13.931	30.812	16.881		0.226	0.855002
			2	13.881	29.881	16	16.655	-0.655	1.57462	1.05746	0.36854
			3	13.845	30.929	17.084		0.429	0.742776
		B	1	13.562	27.473	13.911		-2.744	6.69925
			2	13.499	27.49	13.991		-2.664	6.33788	6.08927	0.62478	0.001
			3	13.536	27.804	14.268		-2.387	5.23069

## Sheet: NRF-1
		group	sample	gapdh Ct	NRF-1 Ct	△Ct	mean of △Ct	△△Ct	2-△△Ct	mean	SD	p/T-test
control	0d	A	1	13.055	24.296	11.241		-0.170333	1.12532
			2	12.917	24.126	11.209	11.4113	-0.202333	1.15056	1.01608	0.172646		mean						std
			3	12.982	24.766	11.784		0.372667	0.772354					Control	OIM					Control	OIM
OIM		B	1	12.922	24.395	11.473		0.0616667	0.958157				0d	1.01608	0.980826				0d	0.172646	0.0232515
			2	12.929	24.322	11.393		-0.0183333	1.01279	0.980826	0.0232515	>0.05	1d	0.973023	0.99188				1d	0.00775599	0.0409027
			3	12.963	24.416	11.453		0.0416667	0.971532				3d	1.00069	1.08548				3d	0.0370627	0.0928798
													5d	1.03322	0.974443				5d	0.260805	0.0896848
													7d	1.05713	1.08126				7d	0.368045	0.0819627
control	1d	A	1	13.488	22.805	9.317		0.028	0.980779
			2	13.468	22.808	9.34	9.289	0.051	0.965267	0.973023	0.039758
			3	13.54	22.75	9.21		-0.079	1.05629
OIM		B	1	13.673	22.909	9.236		-0.053	1.03742
			2	13.593	22.882	9.289		0	1	0.99188	0.0409027	>0.05
			3	13.486	22.867	9.381		0.092	0.938221
control	3d	A	1	12.85	23.687	10.837		-0.00166667	1.00116
			2	12.806	23.58	10.774	10.8387	-0.0646667	1.04584	1.00069	0.0370627
			3	12.767	23.672	10.905		0.0663333	0.955062
OIM		B	1	12.909	23.793	10.884		0.0453333	0.969066
			2	12.923	23.636	10.713		-0.125667	1.09101	1.08548	0.0928798	>0.05
			3	12.766	23.346	10.58		-0.258667	1.19637
control	5d	A	1	12.891	22.416	9.525		-0.447667	1.36383
			2	12.458	22.417	9.959	9.97267	-0.0136667	1.00952	1.03322	0.260805
			3	12.157	22.591	10.434		0.461333	0.726315
OIM		B	1	12.9	22.741	9.841		-0.131667	1.09556
			2	12.727	22.779	10.052		0.0793333	0.946495	0.974443	0.0896848	>0.05
			3	12.583	22.738	10.155		0.182333	0.881277
control	7d	A	1	13.331	22.704	9.373		-0.655	1.57462
			2	13.881	24.324	10.443	10.028	0.415	0.750019	1.05713	0.368045
			3	13.845	24.113	10.268		0.24	0.846745
OIM		B	1	13.562	23.334	9.772		-0.256	1.19416
			2	13.499	23.46	9.961		-0.067	1.04754	1.08126	0.0819627	>0.05
			3	13.536	23.561	10.025		-0.003	1.00208

## Sheet: OCR TO ECAR
OCR/ECAR
Baseline	Control	OIM		Control-SD	OIM-SD			Baseline	OCR/ECAR值	AVERAGE	SD	p		Stress	OCR/ECAR	AVERAGE	SD	p/T-test
1d	0.944635	1.26403		0.16525	0.18506		1d	Control	0.770139					Control	1.10945
3d	1.02379	1.3067		0.161022	0.164005				1.16651	0.944635	0.16525				0.713004	0.918055	0.162135
5d	1.0347	2.70895		0.0760111	0.394066				0.897255						0.931715
7d	1.05622	2.29321		0.165172	0.0910484			OIM	1.37394					OIM	1.0084
									1.00338	1.26403	0.18506	0.143			0.721751	0.879397	0.118763	0.799
Stress	Control	OIM		Control-SD	OIM-SD				1.41477						0.90804
1d	0.918055	0.879397		0.162135	0.118763			Baseline						Stress
3d	1.03317	1.16903		0.174493	0.120558		3d	Control	1.18233					Control	0.786655
5d	1.46956	2.30145		0.0866733	0.137054				0.802952	1.02379	0.161022				1.16607	1.03317	0.174493
7d	1.86459	3.16118		0.227641	0.094892				1.08608						1.1468
								OIM	1.21903					OIM	1.33703
									1.5365	1.3067	0.164005	0.157			1.05988	1.16903	0.120558	0.416
									1.16457						1.11017
							5d	Baseline						Stress
								Control	1.13109					Control	1.34841
									1.02771	1.0347	0.0760111				1.51398	1.46956	0.0866733
									0.945291						1.54628
								OIM	3.2393					OIM	2.49337
									2.29552	2.70895	0.394066	0.004			2.22892	2.30145	0.137054	0.002
									2.59202						2.18205
							7d	Baseline						Stress
								Control	0.830999					Control	1.5528
									1.22249	1.05622	0.165172				1.95107	1.86459	0.227641
									1.11517						2.08991
								OIM	2.32042					OIM	3.28782
									2.17061	2.29321	0.0910484	0.001			3.13632	3.16118	0.094892	0.002
									2.38859						3.05941

## Sheet: phenotype 1d
DAY 1
		ECAR	OCR	ECAR-SD	OCR-SD
Control	baseline	13.12	12.13	1.66	0.74	0.0371486
	stress	19.81	17.86	2.01	1.43	0.0592869
OIM	baseline	10.55	13.16	1.08	1.09	0.0841049
	stress	20.74	18.08	1.01	1.36	0.112211
								DAY1		ECAR	OCR	OCR/ECAR	AVERAGE	SD
								Baseline	control	14.4	11.09	0.770139
										10.75	12.54	1.16651	0.944635	0.16525
										14.21	12.75	0.897255
									OIM	10.59	14.55	1.37394
										11.85	11.89	1.00338	1.26403	0.18506
										9.21	13.03	1.41477
								Stress	control	17.36	19.26	1.10945
										22.3	15.9	0.713004	0.918055	0.162135
										19.77	18.42	0.931715
									OIM	19.05	19.21	1.0084
										22.39	16.16	0.721751	0.879397	0.118763
										20.77	18.86	0.90804

## Sheet: phenotype 3d
DAY3
		ECAR	OCR	ECAR-SD	OCR-SD
Control	baseline	12.01	12.11	1.19	0.88	0.0616246
	stress	19.31	19.6	2.19	1.92	0.0730594
OIM	baseline	15.09	19.56	0.99	1.08	0.0909091
	stress	24.35	28.33	1.4	1.72	0.102381
									DAY 3		ECAR	OCR	OCR/ECAR	AVERAGE	SD
									Baseline	control	10.64	12.58	1.18233
											13.55	10.88	0.802952	1.02379	0.161022
											11.85	12.87	1.08608
										OIM	15.66	19.09	1.21903
											13.7	21.05	1.5365	1.3067	0.164005
											15.92	18.54	1.16457
									Stress	control	22.03	17.33	0.786655
											16.68	19.45	1.16607	1.03317	0.174493
											19.21	22.03	1.1468
										OIM	22.55	30.15	1.33703
											24.55	26.02	1.05988	1.16903	0.120558
											25.96	28.82	1.11017

## Sheet: phenotype 5d
DAY 5
		ECAR	OCR	ECAR-SD	OCR-SD
Control	baseline	11.25	11.62	0.51	0.77	0.125817
	stress	17.44	25.61	0.46	1.26	0.228261
OIM	baseline	6.12	16.31	0.69	0.67	0.0809179
	stress	14.38	32.93	1.19	0.98	0.0686275
									DAY5		ECAR	OCR	OCR/ECAR	AVERAGE	SD
									Baseline	control	10.68	12.08	1.13109
											11.91	12.24	1.02771	1.0347	0.0760111
											11.15	10.54	0.945291
										OIM	5.14	16.65	3.2393
											6.7	15.38	2.29552	2.70895	0.394066
											6.52	16.9	2.59202
									Stress	control	17.91	24.15	1.34841
											16.81	25.45	1.51398	1.46956	0.0866733
											17.61	27.23	1.54628
										OIM	12.83	31.99	2.49337
											14.59	32.52	2.22892	2.30145	0.137054
											15.71	34.28	2.18205

## Sheet: phenotype 7d
DAY7
		ECAR	OCR	ECAR-SD	OCR-SD
Control	baseline	9.34	9.69	1.02	0.56	0.0610022
	stress	13.13	24.29	0.97	1.82	0.208477
OIM	baseline	5.74	13.14	0.13	0.23	0.196581
	stress	10.59	33.45	0.39	0.45	0.128205
											ECAR	OCR	OCR/ECAR	AVERAGE	SD
										control	10.71	8.9	0.830999
									Baseline		8.27	10.11	1.22249	1.05622	0.165172
											9.03	10.07	1.11517
										OIM	5.68	13.18	2.32042
											5.92	12.85	2.17061	2.29321	0.0910484
											5.61	13.4	2.38859
										control	14.11	21.91	1.5528
									Stress		13.49	26.32	1.95107	1.86459	0.227641
											11.79	24.64	2.08991
										OIM	10.18	33.47	3.28782
											10.49	32.9	3.13632	3.16118	0.094892
											11.11	33.99	3.05941
