# Supplementary material for: Metabolic shift and the effect of mitochondrial respiration on the osteogenic differentiation of dental pulp stem cells
Source: PeerJ. 2023 Apr 21;11:e15164. doi: 10.7717/peerj.15164 (PMC10124543; doi:10.7717/peerj.15164)
Supplement: Supplemental Information 5 [file peerj-11-15164-s005.xlsx]

## Sheet: Baseline OCR
baseline	OCR	OIM	OIM+CCCP	SD	SD				Baseline		OCR			p/T-test
	1d	12.62	11.82	1.42	0.75				1d	OIM	11.23
	3d	18.18	12.29	1.13	1.45						12.06	12.6233	1.42446	>0.05
	5d	21	11.63	1.62	1.2						14.58
	7d	21.37	12.49	0.51	1.4					OIM+CCCP	12.81
											11.01	11.82	0.745788	>0.05
											11.64
									3d	OIM	19.77
											17.38	18.1767	1.12666	>0.05
											17.38
										OIM+CCCP	10.5
											12.33	12.29	1.44548	0.01
											14.04
									5d	OIM	20.92
											19.06	21	1.61765	>0.05
											23.02
										OIM+CCCP	11.55
											13.04	11.6267	1.12399	0.003
											10.29
									7d	OIM	22.04
											20.81	21.3667	0.508877	>0.05
											21.25
										OIM+CCCP	10.9
											14.29	12.4933	1.39141	0.001
											12.29

## Sheet: Stress OCR
Stress	OCR	OIM	OIM+CCCP	SD					Stress		OCR	AVERAGE	SD	P/T-test
	1d	19.04	17.41	1.36	1.43				1d	OIM	17.51
	3d	29.09	18.83	0.94	1.09						18.79	19.0367	1.35846	>0.05
	5d	33.11	20.18	0.98	1.26						20.81
	7d	34.02	20.55	0.45	1.82					OIM+CCCP	16.2
											16.61	17.41	1.43111	>0.05
											19.42
									3d	OIM	29.64
											27.77	29.09	0.937692	>0.05
											29.86
										OIM+CCCP	20.14
											17.48	18.8267	1.0862	0.001
											18.86
									5d	OIM	31.9
											29.73	31.1133	0.981235	>0.05
											31.71
										OIM+CCCP	20.77
											21.34	20.18	1.25913	0.001
							OCR/ECAR				18.43
									7d	OIM	33.92
											33.52	34.02	0.454606	>0.05
											34.62
										OIM+CCCP	20.14
											22.96	20.55	1.82357	0.001
											18.55

## Sheet: Baseline-ECAR
baseline	ECAR	OIM	OIM+CCCP	SD					Baseline		ECAR	AVERAGE	SD	P
	1d	11.17	12.84	1.29	1.14				1d	OIM	10.02
	3d	21.21	13.71	0.9	1.25						12.97	11.1667	1.29074	>0.05
	5d	11.49	12.16	1.51	0.96						10.51
	7d	10.2	12.84	1.86	1.02					OIM+CCCP	12.94
											14.18	12.8367	1.14135	>0.05
											11.39
									3d	OIM	20.09
											21.26	21.2067	0.89078	>0.05
											22.27
										OIM+CCCP	12.48
											13.23	13.71	1.24732	0.002
											15.42
									5d	OIM	11.88
											9.48	11.4933	1.51097	>0.05
											13.12
										OIM+CCCP	10.81
											12.97	12.1633	0.96282	>0.05
											12.71
									7d	OIM	10.98
											11.99	10.2033	1.85886	>0.05
											7.64
										OIM+CCCP	13.65
											13.47	12.8433	1.01618	>0.05
											11.41

## Sheet: Stress ECAR
stress	ECAR	OIM	OIM+CCCP	SD					Stress		ECAR	AVERAGE	SD	P/t-test
	1d	20.5	21.83	1.45	1.82				1d	OIM	18.46
	3d	24.34	20.21	1.17	1.92						21.41	20.5	1.44529	>0.05
	5d	19.26	20.35	1.3	1.9						21.63
	7d	18.57	19.09	1.06	1.61					OIM+CCCP	21.72
											19.66	21.83	1.81837	>0.05
											24.11
									3d	OIM	24.66
											22.78	24.34	1.16528	>0.05
											25.58
										OIM+CCCP	22.21
											17.71	20.3467	1.91677	>0.05
											21.12
									5d	OIM	20.7
											17.54	19.2633	1.30589	>0.05
											19.55
										OIM+CCCP	22.78
											18.11	20.35	1.91125	>0.05
											20.16
									7d	OIM	18.92
											17.13	18.57	1.0621	>0.05
											19.66
										OIM+CCCP	20.18
											16.82	19.0933	1.60801	>0.05
											20.28

## Sheet: PCR-ALP
			group	sample	gapdh Ct	ALP Ct	△Ct	mean of △Ct	△△Ct	2-△△Ct	mean	SD	P
		0d	A	1	13.055	24.051	10.996		-0.0206667	1.01443
	control			2	12.917	23.977	11.06	11.0167	0.0433333	0.97041	1.00022	0.0210898			mean						std
				3	12.982	23.976	10.994		-0.0226667	1.01584						Control	OIM	OIM+CCCP				Control	OIM	OIM+CCCP
			B	1	12.922	23.918	10.996		-0.0206667	1.01443					0d	1.00022	1.00468	0.97638			0d	0.0210898	0.00796787	0.0404362
	OIM			2	12.929	23.94	11.011		-0.00566667	1.00394	1.00468	0.00796787			1d	0.986132	1.0297	0.9037			1d	0.0203378	0.0300069	0.0422907
				3	12.963	23.987	11.024		0.00733333	0.99493					3d	1.00223	1.40345	1.0624			3d	0.0678142	0.0733248	0.0475529
			C	1	12.94	24.031	11.091		0.0743333	0.949781					5d	1.01157	1.63795	1.11432			5d	0.152612	0.0841139	0.150454
	OIM+CCCP			2	12.952	23.9211	10.9691		-0.0475667	1.03352	0.97638	0.0404362	>0.05		7d	1.00123	2.32037	1.17524			7d	0.0492458	0.0715274	0.0270107
				3	12.973	24.07	11.097		0.0803333	0.945839
		1d	A	1	13.488	24.721	11.233		0.0126667	0.991259
				2	13.468	24.716	11.248	11.2203	0.0276667	0.981006	0.986132	0.0203378
				3	13.54	24.72	11.18		-0.0403333	1.02835
			B	1	13.73	24.968	11.238		0.0176667	0.987829
				2	13.803	24.943	11.14		-0.0803333	1.05726	1.02951	0.0300069
				3	13.786	24.945	11.159		-0.0613333	1.04343
			C	1	13.673	24.968	11.295		0.0746667	0.949561
				2	13.593	24.943	11.35		0.129667	0.914043	0.903711	0.0422907	>0.05
				3	13.486	24.945	11.459		0.238667	0.847528
		3d	A	1	12.85	26.728	13.878		-0.135	1.09809
				2	12.806	26.883	14.077	14.013	0.064	0.956608	1.00223	0.0678142
				3	12.767	26.851	14.084		0.071	0.951978
			B	1	12.784	26.303	13.519		-0.494	1.40834
				2	12.737	26.174	13.437		-0.576	1.49071	1.40345	0.0733248
				3	12.729	26.351	13.622		-0.391	1.3113
			C	1	12.744	26.603	13.859		-0.154	1.11265
				2	12.7249	26.74	14.0151		0.0021	0.998545	1.06235	0.0475529	0.005
				3	12.7435	26.651	13.9075		-0.1055	1.07587
		5d	A	1	12.89	25.903	13.013		-0.267	1.2033
				2	12.458	25.736	13.278	13.28	-0.002	1.00139	1.01153	0.152612
				3	12.157	25.706	13.549		0.269	0.829895					mean						std
			B	1	12.951	25.501	12.55		-0.73	1.65864						OIM	OIM+CCCP					OIM	OIM+CCCP
				2	12.917	25.408	12.491		-0.789	1.72788	1.63724	0.0841139			0d	1.00468	0.97638				0d	0.00796787	0.0404362
				3	12.92	25.591	12.671		-0.609	1.5252					1d	1.0297	0.9037				1d	0.0300069	0.0422907
			C	1	11.79	24.673	12.883		-0.397	1.31677					3d	1.40345	1.0624				3d	0.0733248	0.0475529
				2	11.24	24.421	13.181		-0.099	1.07103	1.11458	0.150489	0.013		5d	1.63795	1.11432				5d	0.0841139	0.150454
				3	11.17	24.515	13.345		0.065	0.955945					7d	2.32037	1.17524				7d	0.0715274	0.0270107
		7d	A	1	13.931	24.014	10.083		-0.0756667	1.05385
				2	13.881	24.019	10.138	10.1587	-0.0206667	1.01443	1.00123	0.0492458
				3	13.845	24.1	10.255		0.0963333	0.935407
			B	1	13.562	22.504	8.942		-1.21667	2.32409
				2	13.499	22.391	8.892		-1.26667	2.40605	2.32037	0.0715274	0
				3	13.536	22.537	9.001		-1.15767	2.23096
			C	1	13.931	23.848	9.917		-0.241667	1.18236
				2	13.969	23.86	9.891		-0.267667	1.20386	1.17505	0.0270107
				3	13.98	23.951	9.971		-0.187667	1.13892

## Sheet: PCR-col
		group	sample	gapdh Ct	COL-1 Ct	△Ct	mean of △Ct	△△Ct	2-△△Ct	mean	sd	P
control	0d	A	1	13.055	16.256	3.201		-0.166667	1.12246
			2	12.917	16.341	3.424	3.36767	0.0563333	0.961705	1.00351	0.085337			mean					std
			3	12.982	16.46	3.478		0.110333	0.926374						OIM	OIM+CCCP				OIM	OIM+CCCP
OIM		B	1	12.519	15.8535	3.3345		-0.0331667	1.02326					0d	1.00506	1.00472			0d	0.015	0.069
			2	12.516	15.903	3.387		0.0193333	0.986689	1.00509	0.0149294			1d	0.972821	0.955493			1d	0.025	0.036
			3	12.531	15.891	3.36		-0.00766667	1.00533					3d	1.03155	0.977705			3d	0.087	0.076
OIM+CCCP		C	1	12.64	16.146	3.506		0.138333	0.908568					5d	1.45564	0.976139			5d	0.087	0.081
			2	12.652	15.923	3.271		-0.0966667	1.0693	1.00478	0.069338	>0.05		7d	1.75249	1.04882			7d	0.106	0.119
			3	12.703	16.019	3.316		-0.0516667	1.03646
	1d	A	1	13.488	15.858	2.37		-0.0413333	1.02906
			2	13.468	15.932	2.464	2.41133	0.0526667	0.964153	0.996608	0.0270282
			3	13.54	15.94	2.4		-0.0113333	1.00789
		B	1	13.73	16.134	2.404		-0.00733333	1.0051
			2	13.683	16.177	2.494		0.0826667	0.944311	0.972973	0.0249358
			3	13.666	16.122	2.456		0.0446667	0.969514
		C	1	13.745	16.258	2.513		0.101667	0.931956
			2	13.928	16.331	2.403		-0.00833333	1.00579	0.955493	0.0355915	>0.05
			3	13.713	16.231	2.518		0.106667	0.928731
	3d	A	1	12.85	16.833	3.983		-0.0546667	1.03862
			2	12.806	16.73	3.924	4.03767	-0.113667	1.08197	1.00349	0.0822666
			3	12.767	16.973	4.206		0.168333	0.88987
		B	1	12.909	16.891	3.982		-0.0556667	1.03934
			2	12.923	16.78	3.857		-0.180667	1.13341	1.03155	0.0865273
			3	12.766	16.921	4.155		0.117333	0.92189
		C	1	12.784	16.792	4.008		-0.0296667	1.02078
			2	12.737	16.973	4.236		0.198333	0.871557	0.977705	0.0755009	>0.05
			3	12.729	16.709	3.98		-0.0576667	1.04078
	5d	A	1	12.891	15.75	2.859		-0.366333	1.28907
			2	12.458	15.81	3.352	3.22533	0.126667	0.915945	1.01732	0.194212
			3	12.157	15.622	3.465		0.239667	0.846941
		B	1	12.9	15.528	2.628		-0.597333	1.51292
			2	12.727	15.347	2.62		-0.605333	1.52133	1.45564	0.0870142
			3	12.583	15.394	2.811		-0.414333	1.33268
		C	1	12.216	15.316	3.1		-0.125333	1.09076
			2	12.214	15.556	3.342		0.116667	0.922316	0.976129	0.0811067	0.005
			3	12.204	15.557	3.353		0.127667	0.915311
	7d	A	1	13.931	17.823	3.892		-0.0583333	1.04126
			2	13.881	17.799	3.918	3.95033	-0.0323333	1.02266	1.00101	0.044435
			3	13.845	17.886	4.041		0.0906667	0.939089
		B	1	13.431	16.52	3.089		-0.861333	1.81672
			2	13.369	16.639	3.27		-0.680333	1.60251	1.75249	0.106417
			3	13.38	16.452	3.072		-0.878333	1.83825
		C	1	13.431	17.21	3.779		-0.171333	1.1261
			2	13.369	17.131	3.762		-0.188333	1.13945	1.04881	0.118864	0.003
			3	13.38	17.5133	4.1333		0.182967	0.88089

## Sheet: ALP activity
average	Control	OIM	OIM+CCCP		SD	control	OIM	OIM+CCCP		average	OIM	OIM+CCCP			SD	OIM	OIM+CCCP
0d	2.1	2.2	2.174		0d	0.180169	0.09	0.13925		0d	2.2	2.174			0d	0.09	0.13925
1d	2.24	2.36	2.16		1d	0.220368	0.19143	0.138976		1d	2.36	2.16			1d	0.19143	0.138976
3d	1.97638	5.63366	1.91334		3d	0.103023	0.073634	0.0861737		3d	5.63366	1.91334			3d	0.073634	0.0861737
5d	2.85832	7.74034	2.2662		5d	0.0844868	0.0663987	0.195765		5d	7.74034	2.2662			5d	0.0663987	0.195765
7d	2.29294	11.2474	3.37726		7d	0.106877	0.18186	0.0483776		7d	11.2474	3.37726			7d	0.18186	0.0483776
day	group	OD	protein	ALP activity	average	SD	p
0d	A	0.067	0.78135	1.87562
control	A	0.069	0.78135	2.09628	2.09628	0.180169
	A	0.071	0.78135	2.31694
	B	0.069	0.74335	2.20345
OIM	B	0.068	0.74335	2.08747	2.20345	0.0946898
	B	0.07	0.74335	2.31942
	C	0.071	0.87551	2.06776
OIM+CCCP	C	0.071	0.87551	2.06776	2.16623	0.13925	>0.05
	C	0.074	0.87551	2.36315
1d	A	0.072	0.88714	2.44826
	A	0.067	0.88714	1.9382	2.24423	0.220368
	A	0.071	0.88714	2.34625
	B	0.076	0.9714	2.60854
	B	0.071	0.9714	2.14273	2.36011	0.19143
	B	0.073	0.9714	2.32905
	C	0.071	0.9209	2.26023
	C	0.071	0.9209	2.26023	2.16196	0.138976	>0.05
	C	0.068	0.9209	1.96542
3d	A	0.132	3.09468	2.09179
	A	0.124	3.09468	1.84203	1.97732	0.103023
	A	0.129	3.09468	1.99813
	B	0.242	3.09275	5.52953
	B	0.247	3.09275	5.68573	5.63366	0.073634
	B	0.247	3.09275	5.68573
	C	0.132	3.21499	2.01351
	C	0.129	3.21499	1.92336	1.91334	0.0861737	0
	C	0.125	3.21499	1.80315
5d	A	0.353	4.71055	2.8568
	A	0.343	4.71055	2.75829	2.86008	0.0844868
	A	0.364	4.71055	2.96516
	B	0.695	3.79938	7.71893
	B	0.704	3.79938	7.82885	7.73929	0.0663987
	B	0.691	3.79938	7.67008
	C	0.306	4.45704	2.52995
	C	0.261	4.45704	2.06144	2.2662	0.195765	0
	C	0.275	4.45704	2.2072
7d	A	0.305	3.85688	2.41656
	A	0.279	3.85688	2.15477	2.28566	0.106877
	A	0.292	3.85688	2.28566
	B	1.56	5.08134	11.4258
	B	1.504	5.08134	10.9978	11.2474	0.18186
	B	1.546	5.08134	11.3188
	C	0.472	4.58808	3.44498
	C	0.461	4.58808	3.35187	3.37726	0.0483776	0
	C	0.459	4.58808	3.33494
