# Supplementary material for: Metabolic shift and the effect of mitochondrial respiration on the osteogenic differentiation of dental pulp stem cells
Source: PeerJ. 2023 Apr 21;11:e15164. doi: 10.7717/peerj.15164 (PMC10124543; doi:10.7717/peerj.15164)
Supplement: Supplemental Information 6 [file peerj-11-15164-s006.xls]

## Sheet: ALP acitvity
	Control	OIM	OIM+AICAR	SD		control	OIM	OIM+AICAR
0d	2.1	2.06	2.1		0d	0.12	0.0184439	0.178469
1d	2.24	2.36	2.24		1d	0.061	0.42042	0.0857422
3d	1.97638	5.23366	2.37638		3d	0.103023	0.0895797	0.123504
5d	2.85832	7.14034	2.58315		5d	0.066974	0.426521	0.22
7d	2.29294	9.24745	2.79294		7d	0.143892	0.212656	0.100706
day	group	OD	protein	ALP	AVERAGE	SD	P
0	A	0.11	2.28335	2.26527
Control	A	0.103	2.28335	2.00099	2.10167	0.116707
	A	0.104	2.28335	2.03875
	B	0.103	2.20335	2.07364
OIM	B	0.102	2.20335	2.03452	2.0606	0.0184439
	B	0.103	2.20335	2.07364
OIM+AICAR	C	0.094	1.94551	1.94967
	C	0.103	1.94551	2.34847	2.09737	0.178469	0.77
	C	0.095	1.94551	1.99398
1	A	0.066	0.70114	2.3233
	A	0.065	0.70114	2.19423	2.23725	0.0608453
	A	0.065	0.70114	2.19423
	B	0.068	0.6654	2.7201
	B	0.067	0.6654	2.5841	2.35742	0.42042
	B	0.061	0.6654	1.76807
	C	0.072	0.9951	2.18264
	C	0.074	0.9951	2.36453	2.24327	0.0857422	0.719
	C	0.072	0.9951	2.18264
3	A	0.132	3.09468	2.09179
	A	0.129	3.09468	1.99813	1.97732	0.103023
	A	0.124	3.09468	1.84203
	B	0.232	3.09275	5.21713
	B	0.229	3.09275	5.1234	5.22754	0.0895797
	B	0.236	3.09275	5.34209
	C	0.149	3.21499	2.52441
	C	0.139	3.21499	2.22388	2.38416	0.123504	0
	C	0.145	3.21499	2.4042
5	A	0.351	4.71055	2.83709
	A	0.347	4.71055	2.79769	2.86336	0.066974
	A	0.363	4.71055	2.95531
	B	0.685	3.79938	7.59679
	B	0.657	3.79938	7.25482	7.14082	0.426521
	B	0.601	3.79938	6.57086
	C	0.306	4.45704	2.52995
	C	0.332	4.45704	2.80065	2.57507	0.168808	0
	C	0.293	4.45704	2.39461
7	A	0.31	3.85688	2.46691
	A	0.275	3.85688	2.11449	2.28902	0.143892
	A	0.292	3.85688	2.28566
	B	1.296	5.08134	9.40811
	B	1.294	5.08134	9.39283	9.25017	0.212656
	B	1.236	5.08134	8.94955
	C	0.405	4.58808	2.87787
	C	0.401	4.58808	2.84401	2.7904	0.100706	0
	C	0.378	4.58808	2.64933

## Sheet: PCR-ALP-AICAR
		group	sample	gapdh Ct	ALP Ct	△Ct	mean of △Ct	△△Ct	2-△△Ct	mean	SD	p
control	0d	A	1	13.055	24.051	10.996		-0.0206667	1.01443
			2	12.917	23.977	11.06	11.0167	0.0433333	0.97041	1.00022	0.0210898		mean					std
			3	12.982	23.976	10.994		-0.0226667	1.01584					Control	OIM	OIM+AICAR			Control	OIM	OIM+AICAR
OIM		B	1	12.922	23.918	10.996		-0.0206667	1.01443				0d	1.00022	1.00468	0.97638		0d	0.0210898	0.00796787	0.0404362
			2	12.929	23.94	11.011		-0.00566667	1.00394	1.00468	0.00796787		1d	0.986132	0.991802	1.00857		1d	0.0203378	0.0422907	0.0881291
			3	12.963	23.987	11.024		0.00733333	0.99493				3d	1.02735	1.44958	1.14689		3d	0.0678142	0.108522	0.0608149
OIM+AIACR		C	1	12.94	24.031	11.091		0.0743333	0.949781				5d	1.10251	1.43795	1.11432		5d	0.152926	0.172693	0.150454
			2	12.952	23.9211	10.9691		-0.0475667	1.03352	0.97638	0.0404362	>0.05	7d	1.03414	2.36507	0.987451		7d	0.0492458	0.0715274	0.0322457
			3	12.973	24.07	11.097		0.0803333	0.945839
	1d	A	1	13.488	24.721	11.233		0.0126667	0.991259
			2	13.468	24.716	11.248	11.2203	0.0276667	0.981006	0.986132	0.0203378
			3	13.54	24.72	11.18		-0.0403333	1.02835
		B	1	13.673	24.968	11.295		0.0746667	0.949561
			2	13.593	24.943	11.35		0.129667	0.914043	0.991802	0.0422907
			3	13.486	24.945	11.459		0.238667	0.847528
		C	1	13.545	24.85	11.305		0.0846667	0.943002
			2	13.743	24.783	11.04		-0.180333	1.13315	1.00857	0.0881291	>0.05
			3	13.613	24.908	11.295		0.0746667	0.949561
	3d	A	1	12.85	26.728	13.878		-0.135	1.09809
			2	12.806	26.883	14.077	14.013	0.064	0.956608	1.02735	0.0678142
			3	12.767	26.851	14.084		0.071	0.951978
		B	1	13.209	26.722	13.513		-0.5	1.41421
			2	13.403	26.741	13.338		-0.675	1.5966	1.44958	0.108522
			3	13.348	26.941	13.593		-0.42	1.33793
		C	1	12.51	26.303	13.793		-0.22	1.16473
			2	12.437	26.174	13.737		-0.276	1.21083	1.14689	0.0608149	0.026
			3	12.429	26.351	13.922		-0.091	1.06511
	5d	A	1	12.891	25.903	13.012		-0.267667	1.20386
			2	12.458	25.736	13.278	13.2797	-0.00166667	1.00116	1.01157	0.152926			mean					std
			3	12.157	25.706	13.549		0.269333	0.829703						OIM	OIM+AICAR				OIM	OIM+AICAR
		B	1	12.9	25.501	12.601		-0.678667	1.60066					0d	1.00468	0.97638			0d	0.00796787	0.0404362
			2	12.727	25.408	12.681		-0.598667	1.51432	1.43795	0.172693			1d	0.991802	1.00857			1d	0.0422907	0.0881291
			3	12.583	25.601	13.018		-0.261667	1.19886					3d	1.44958	1.14689			3d	0.108522	0.0608149
		C	1	11.79	24.673	12.883		-0.396667	1.31646					5d	1.43795	1.11432			5d	0.172693	0.150454
			2	11.24	24.421	13.181		-0.0986667	1.07078	1.11432	0.150454	0.116		7d	2.36507	0.987451			7d	0.0715274	0.0322457
			3	11.17	24.515	13.345		0.0653333	0.955724
	7d	A	1	13.931	24.014	10.083		-0.0756667	1.05385
			2	13.881	24.019	10.138	10.1587	-0.0206667	1.01443	1.03414	0.0492458
			3	13.845	24.1	10.255		0.0963333	0.935407
		B	1	13.562	22.504	8.942		-1.21667	2.32409
			2	13.499	22.391	8.892		-1.26667	2.40605	2.32037	0.0715274
			3	13.536	22.537	9.001		-1.15767	2.23096
		C	1	13.801	23.948	10.147		-0.0116667	1.00812
			2	13.615	23.86	10.245		0.0863333	0.941914	0.987451	0.0322457	0
			3	13.81	23.951	10.141		-0.0176667	1.01232

## Sheet: PCR-col-AICAR
		group	sample	gapdh Ct	COL-1 Ct	△Ct	mean of △Ct	△△Ct	2-△△Ct	mean	SD	P
control	0d	A	1	13.055	16.256	3.201		-0.166667	1.12246
			2	12.917	16.341	3.424	3.36767	0.0563333	0.961705	1.00351	0.085337		mean						std
			3	12.982	16.46	3.478		0.110333	0.926374					Control	OIM	OIM+AICAR				Control	OIM	OIM+AICAR
OIM		B	1	12.622	15.853	3.231		-0.136667	1.09936				0d	1.00351	1.17158	1.17472			0d	0.085337	0.100518	0.0961423
			2	12.929	15.903	2.974		-0.393667	1.31373	1.17158	0.100518		1d	1.00037	1.14564	0.985493			1d	0.0270282	0.153322	0.0355915
			3	12.663	15.891	3.228		-0.139667	1.10165				3d	1.00349	1.31517	1.09904			3d	0.0822666	0.0668232	0.213538
OIM-AIACR		C	1	12.84	16.146	3.306		-0.0616667	1.04367				5d	1.01732	1.45564	0.976891			5d	0.194212	0.0870142	0.121332
			2	12.902	15.923	3.021		-0.346667	1.27162	1.17472	0.0961423	>0.05	7d	1.00101	1.84845	0.952659			7d	0.044435	0.0388196	0.0552119
			3	12.923	16.017	3.094		-0.273667	1.20888
	1d	A	1	13.488	15.858	2.37		-0.0413333	1.02906
			2	13.468	15.932	2.464	2.41133	0.0526667	0.964153	1.00037	0.0270282
			3	13.54	15.94	2.4		-0.0113333	1.00789
		B	1	13.673	15.533	1.86		-0.551333	1.46544
			2	13.593	15.476	1.883		-0.528333	1.44226	1.34564	0.153322
			3	13.486	15.722	2.236		-0.175333	1.12923
		C	1	13.745	16.258	2.513		0.101667	0.931956
			2	13.928	16.331	2.403		-0.00833333	1.00579	0.955493	0.0355915	>0.05
			3	13.713	16.231	2.518		0.106667	0.928731
	3d	A	1	12.85	16.833	3.983		-0.0546667	1.03862
			2	12.806	16.73	3.924	4.03767	-0.113667	1.08197	1.00349	0.0822666
			3	12.767	16.973	4.206		0.168333	0.88987
		B	1	13.299	16.891	3.592		-0.445667	1.36194
			2	13.189	16.78	3.591		-0.446667	1.36289	1.31517	0.0668232
			3	13.171	16.921	3.75		-0.287667	1.22066
		C	1	13.224	16.792	3.568		-0.469667	1.38479
			2	12.737	16.973	4.236		0.198333	0.871557	1.09904	0.213538	0.224
			3	12.729	16.709	3.98		-0.0576667	1.04078
	5d	A	1	12.891	15.75	2.859		-0.366333	1.28907
			2	12.458	15.81	3.352	3.22533	0.126667	0.915945	1.01732	0.194212
			3	12.157	15.622	3.465		0.239667	0.846941
		B	1	12.9	15.528	2.628		-0.597333	1.51292
			2	12.727	15.347	2.62		-0.605333	1.52133	1.45564	0.0870142
			3	12.583	15.394	2.811		-0.414333	1.33268					mean						std
		C	1	12.29	15.316	3.026		-0.199333	1.14817						OIM	OIM+AICAR					OIM	OIM+AICAR
			2	12.15	15.556	3.406		0.180667	0.882295	0.976891	0.121332	0.011		0d	1.17158	1.17472				0d	0.100518	0.0961423
			3	12.18	15.557	3.377		0.151667	0.90021					1d	1.14564	0.985493				1d	0.153322	0.0355915
	7d	A	1	13.931	17.823	3.892		-0.0583333	1.04126					3d	1.31517	1.09904				3d	0.0668232	0.213538
			2	13.881	17.799	3.918	3.95033	-0.0323333	1.02266	1.00101	0.044435			5d	1.45564	0.976891				5d	0.0870142	0.121332
			3	13.845	17.886	4.041		0.0906667	0.939089					7d	1.84845	0.952659				7d	0.0388196	0.0552119
		B	1	13.88	16.903	3.023		-0.927333	1.90176
			2	13.829	16.923	3.094		-0.856333	1.81043	1.84845	0.0388196
			3	13.945	17.021	3.076		-0.874333	1.83316
		C	1	12.431	16.52	4.089		0.138667	0.908358
			2	12.732	16.639	3.907		-0.0433333	1.03049	0.952659	0.0552119	0
			3	12.38	16.452	4.072		0.121667	0.919125

## Sheet: PCR-TFAM
		group	sample	gapdh Ct	TFAM Ct	△Ct	mean of △Ct	△△Ct	2-△△Ct	mean	SD	P
control	0d	A	1	13.055	31.244	18.189		-0.479667	1.39442
			2	12.917	32.03	19.113	18.6687	0.444333	0.734924	1.03505	0.272478		mean					std
			3	12.982	31.686	18.704		0.0353333	0.975806					Control	OIM	OIM+AICAR			Control	OIM	OIM+AICAR
OIM		B	1	12.922	31.815	18.893		0.224333	0.85599				0d	1.03505	0.958952	1.00524		0d	0.272478	0.115557	0.126418
			2	12.929	31.425	18.496		-0.172667	1.12714	0.958952	0.115557		1d	1.03473	1.11391	1.03955		1d	0.015721	0.037327	0.0790716
			3	12.963	31.545	18.582		-0.0866667	1.06191				3d	1.00635	1.60506	1.1128		3d	0.0482912	0.445017	0.11228
OIM+AICAR		C	1	12.94	31.458	18.518		-0.150667	1.11008				5d	1.16909	3.94932	1.32618		5d	0.558808	0.298199	0.0650186
			2	12.952	31.512	18.56		-0.108667	1.07823	1.00524	0.126418	>0.05	7d	1.00045	6.08001	1.6894		7d	0.0299371	0.194886	0.395458
			3	12.973	31.915	18.942		0.273333	0.827406
	1d	A	1	13.488	31.391	17.903		-0.0646667	1.04584
			2	13.468	31.402	17.934	17.9677	-0.0336667	1.02361	1.03473	0.0482912
			3	13.54	31.606	18.066		0.0983333	0.934111
		B	1	13.673	31.943	18.27		0.302333	0.81094
			2	13.593	30.759	17.166		-0.801667	1.74311	1.11391	0.445017
			3	13.486	31.798	18.312		0.344333	0.787672
		C	1	13.445	31.213	17.768		-0.199667	1.14843
			2	13.528	31.378	17.85		-0.117667	1.08498	1.03945	0.11228	>0.05
			3	13.444	31.588	18.144		0.176333	0.884949
	3d	A	1	12.85	20.252	7.402		-0.146333	1.10675
			2	12.806	20.271	7.465	7.54833	-0.0833333	1.05946	1.00635	0.110257
			3	12.767	20.545	7.778		0.229667	0.852832
		B	1	12.909	19.633	6.724		-0.824333	1.77072
			2	12.923	19.714	6.791		-0.757333	1.69036	1.60506	0.180462
			3	12.766	19.877	7.111		-0.437333	1.3541
		C	1	12.784	20.001	7.217		-0.331333	1.25818
			2	12.737	19.926	7.189		-0.359333	1.28283	1.1128	0.223262	0.072
			3	12.729	20.604	7.875		0.326667	0.797377
	5d	A	1	12.891	29.625	16.734		-0.841333	1.79171
			2	12.458	29.678	17.22	17.5753	-0.355333	1.27928	1.16909	0.558808
			3	12.157	30.929	18.772		1.19667	0.436282
		B	1	11.7	27.17	15.47		-2.10533	4.30297
			2	12.727	28.465	15.738		-1.83733	3.57349	3.94932	0.298199
			3	12.357	27.943	15.586		-1.98933	3.97053
		C	1	11.79	28.896	17.106		-0.469333	1.38447
			2	11.24	28.375	17.135		-0.440333	1.35692	1.32541	0.0650186	0		mean					std
			3	11.17	28.441	17.271		-0.304333	1.23485						OIM	OIM+AICAR				OIM	OIM+AICAR
	7d	A	1	15.531	30.02	14.489		0.0496667	0.96616					0d	0.958952	1.00524			0d	0.115557	0.126418
			2	15.681	30.126	14.445	14.4393	0.00566667	0.99608	1.00045	0.0299371			1d	1.11391	1.03955			1d	0.037327	0.0790716
			3	15.645	30.029	14.384		-0.0553333	1.0391					3d	1.60506	1.1128			3d	0.445017	0.11228
		B	1	13.562	25.401	11.839		-2.60033	6.06427					5d	3.94932	1.32618			5d	0.298199	0.0650186
			2	13.499	25.39	11.891		-2.54833	5.84958	6.08001	0.194886			7d	6.08001	1.6894			7d	0.194886	0.395458
			3	13.536	25.314	11.778		-2.66133	6.32617
		C	1	13.431	26.707	13.276		-1.16333	2.23974
			2	13.369	27.223	13.854		-0.585333	1.50039	1.6894	0.395458	0
			3	13.38	27.41	14.03		-0.409333	1.32807

## Sheet: ampk-wb
group				RATIO TO GAPDH		relative expression		p-AMPK/AMPK				p/t-test
1D	OIM	OIM+CCCP		OIM	OIM+CCCP	OIM	OIM+CCCP	OIM	OIM+CCCP	OIM	OIM+CCCP			p-AMPK/AMPK	OIM	OIM+CCCP	SD	OIM	OIM+CCCP
p-AMPK	27713	36345		0.422822	0.711628	1	1.68305	0.715969	1.26523	1	1.76716			1d	1	1.17059		0	0.428495
	40154	56672		0.807002	1.15598	1	1.43244	1.14824	0.895788	1	0.780139			3d	1	1.70042		0	0.0784617
	40686	42464		0.767183	0.686575	1	0.894931	0.822854	0.793631	1	0.964486	0.603		5d	1	1.55388		0	0.182975
AMPK	38707	28726		0.590559	0.56245	1	0.952403							7d	1	1.78854		0	0.324081
	34970	63265		0.702816	1.29046	1	1.83613
	49445	53506		0.932344	0.865107	1	0.927884
GAPDH	65543	51073
	49757	49025
	53033	61849
3D	OIM	OIM+CCCP
p-AMPK	43658	58336		1.29637	1.54742	1	1.19365	1.13312	1.87479	1	1.65454	0
	43119	66868		0.76057	0.920616	1	1.21043	1.09978	1.99154	1	1.81086
	33405	39507		0.450184	0.413141	1	0.917715	0.960908	1.57192	1	1.63587
AMPK	38529	31116		1.14407	0.82538	1	0.721439
	39207	33576		0.691567	0.462263	1	0.668428
	34764	25133		0.468499	0.262826	1	0.560996
GAPDH	33677	37699
	56693	72634
	74203	95626
5D	OIM	OIM+CCCP
p-AMPK	40370	55976		0.836632	1.165	1	1.39249	1.61778	2.21345	1	1.36821	0.013
	23823	29494		0.32242	0.582528	1	1.80674	0.613315	0.914231	1	1.49064
	25712	48934		0.417057	0.752622	1	1.8046	1.24345	2.2417	1	1.80281
AMPK	24954	25289		0.517149	0.526328	1	1.01775
	38843	32261		0.525701	0.637179	1	1.21206
	20678	21829		0.335404	0.335738	1	1.00099
GAPDH	48253	48048
	73888	50631
	61651	65018
7D	OIM	OIM+CCCP
p-AMPK	26072	38919		0.460929	0.614688	1	1.33359	0.465463	0.681117	1	1.46331	0.026
	22080	37636		0.277446	0.556564	1	2.00603	0.946908	1.58274	1	1.67148
	17477	30142		0.192472	0.377275	1	1.96016	0.327905	0.731495	1	2.23082
AMPK	56013	57140		0.990259	0.902472	1	0.911349
	23318	23779		0.293002	0.351646	1	1.20015
	53299	41206		0.586974	0.515758	1	0.878673
GAPDH	56564	63315
	79583	67622
	90803	79894
